# Supplementary material
Source: publisher figshare collection journal article supplement (https://plos.figshare.com/articles/dataset/_/127380)
Supplement: Supplementary file 1 [file 1 › Figure_S1.pdf]

Figure S1. Log-log plot of the Bidimensional power spectrum for the periphyton's biomass distribution. Where  $E(k)$  is the value of the spectrum often called energy spectrum and  $k$  is the frequency. The values of  $E(k)$  are averaged for each week. Beta is the slope of the lines estimated over a fixed range for all weeks, all slopes are greater than one, indicating non-stationarity in the data this justifies the application of a gradient to estimate the multifractal spectrum (Davis et al. 1996).

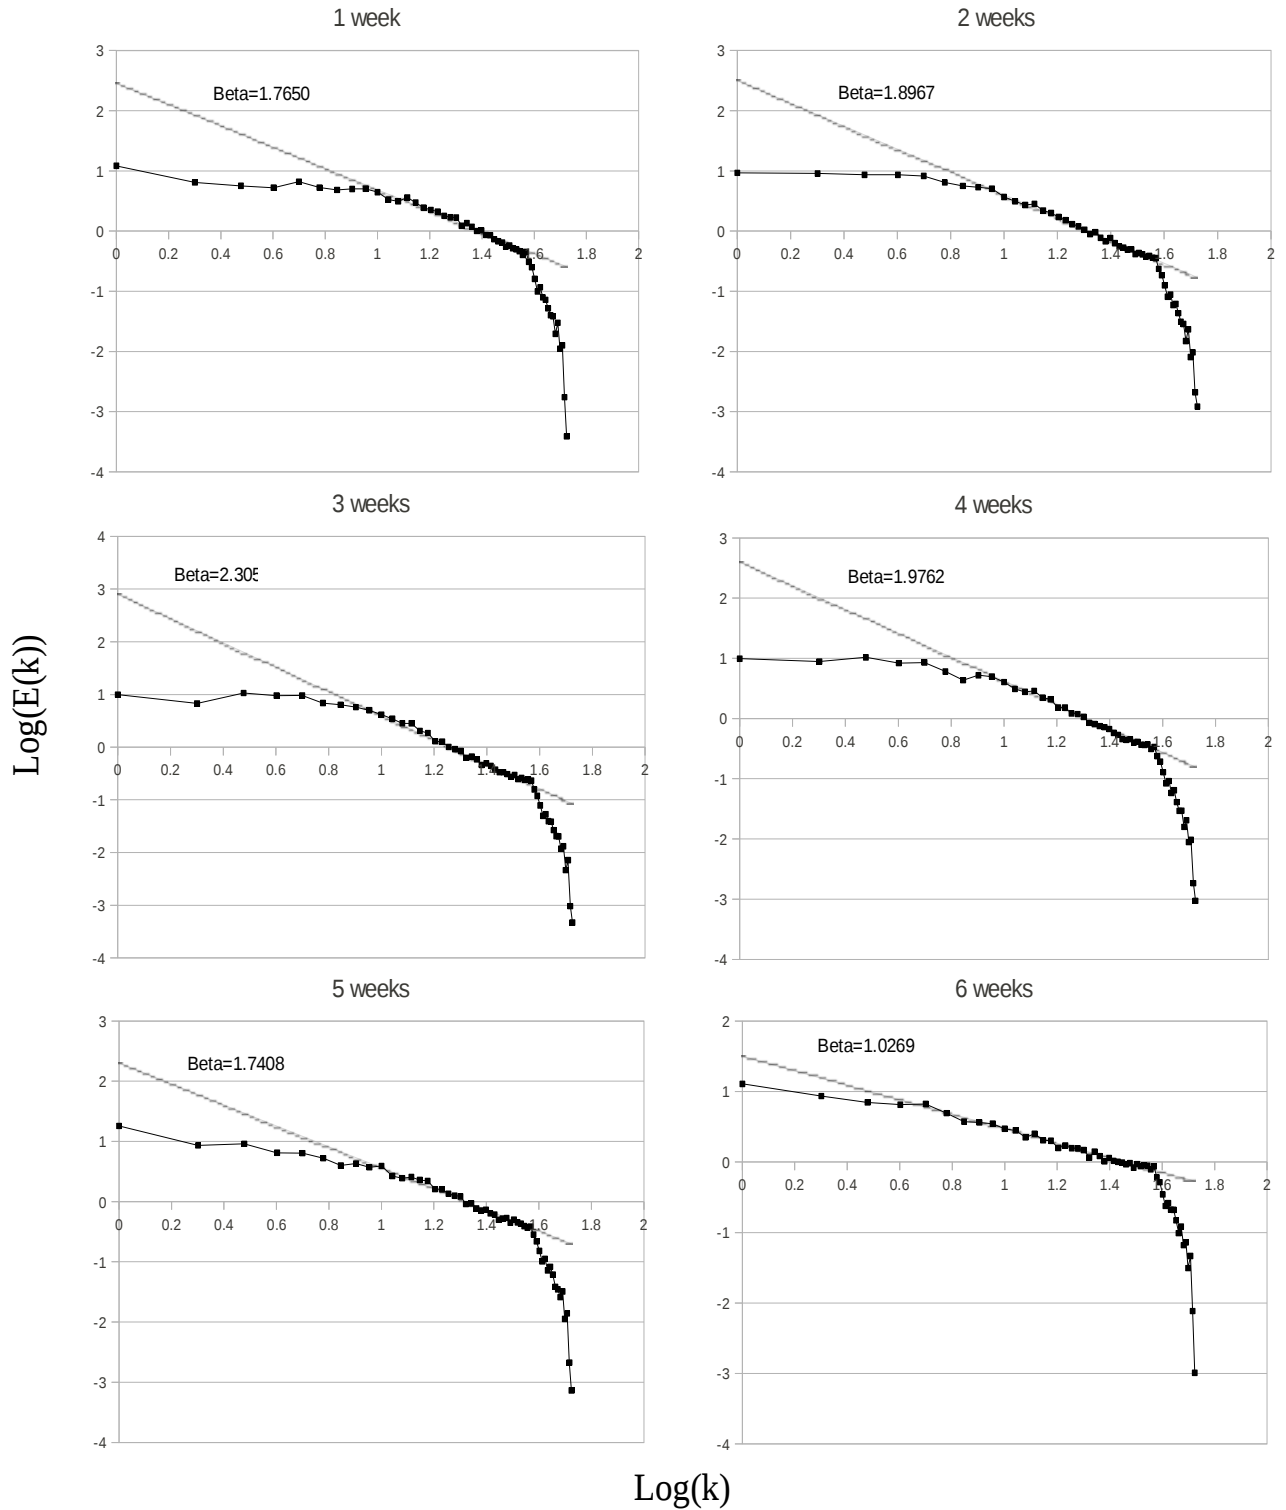

## ***Bibliography***

Davis, A., Marshak, A., Wiscombe, W. & Cahalan, R. (1996). Scale invariance of liquid water distributions in marine stratocumulus. Part I: Spectral properties and stationarity issues. *Journal of Atmospheric Sciences*, 53, 1538-1558.
