# Supplementary material
Source: publisher figshare collection journal article supplement (https://plos.figshare.com/articles/dataset/_/127380)

Figure S5. A graph in logarithmic scale of  $X_q$  versus  $\varepsilon$  for  $q$  varying from -5 to 5, showing a linear fit for all  $q$  considered, corresponding to the plates with 4 weeks of community development. The  $R^2$  values were between 0.971 and 0.999. The label number refers to the original image number.

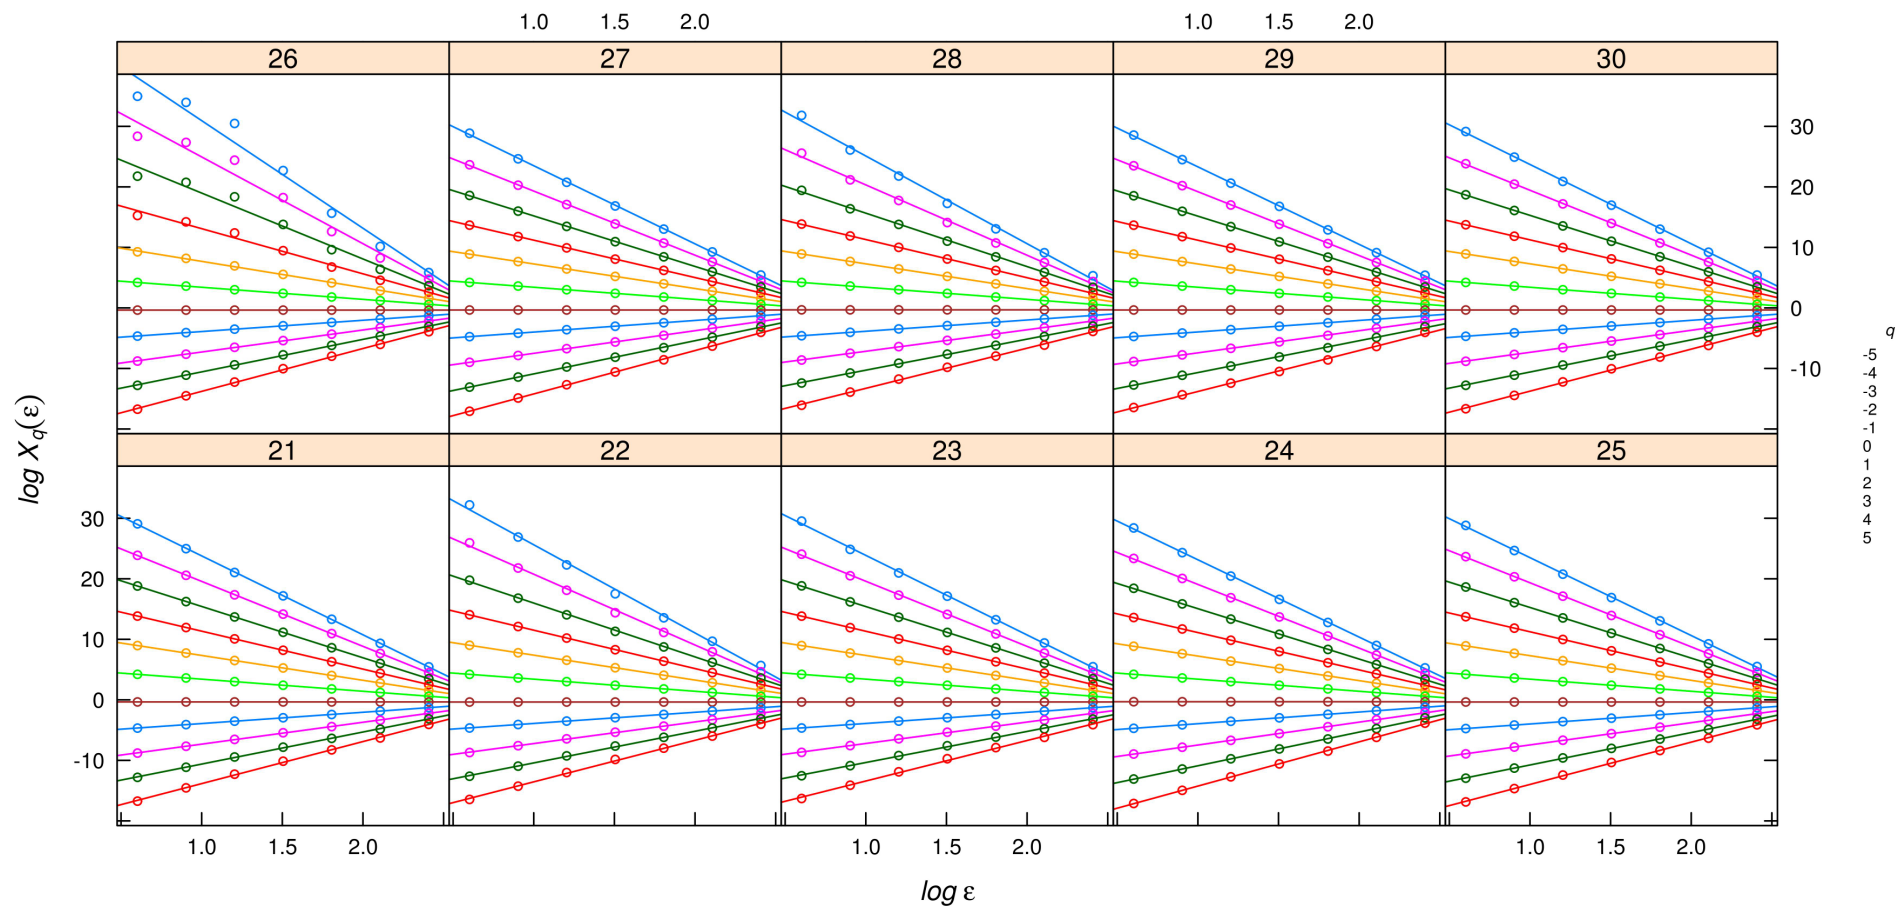

Supplement: Supplementary file 1 [file 1 › Figure_S5.pdf]
